# Supplementary material for: Facile fabrication, characterization and catalytic activity of a NiMo/Al2O3 nanocatalyst via a solution combustion method used in a low temperature hydrodesulfurization process: the effect of fuel to oxidant ratio
Source: Royal Society of Chemistry journal article supplement (doi:10.1039/d0ra01590c), 2020-01-01
Supplement: d0ra01590c1.pdf [file d0ra01590c1.pdf]

**(a) Preparation of NiMo/Al<sub>2</sub>O<sub>3</sub>**

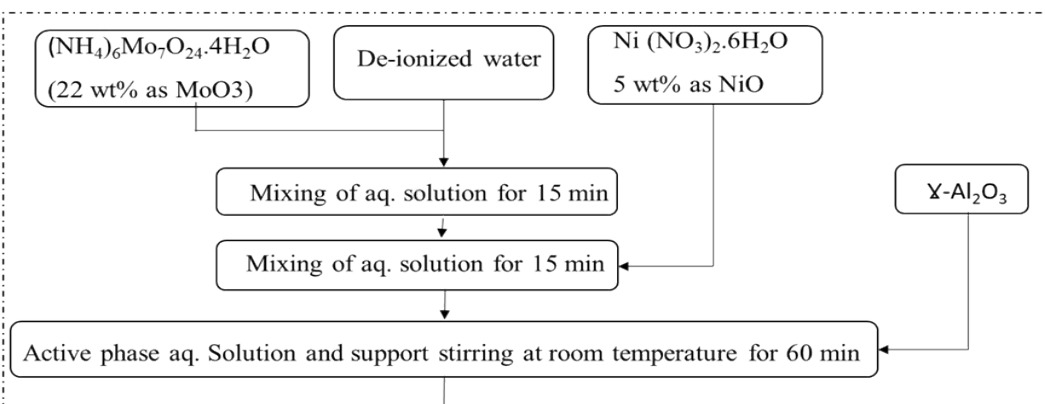

**(b) Combustion assisted synthesis NiMo/Al<sub>2</sub>O<sub>3</sub>**

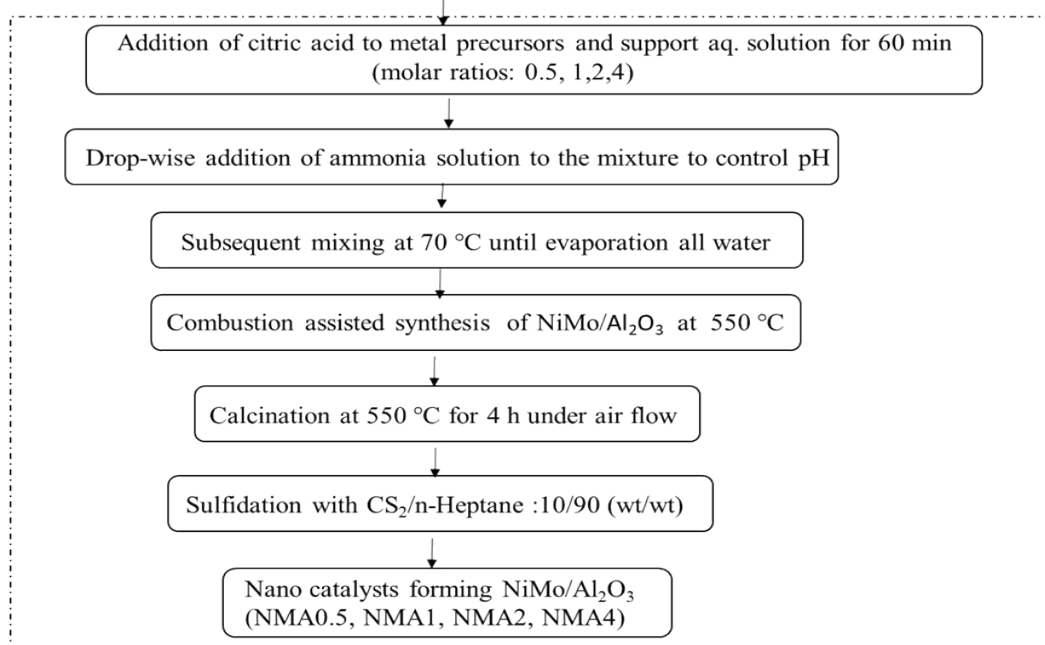

**Figure 1.S. Preparation steps of combustion assisted synthesis of NiMo/Al<sub>2</sub>O<sub>3</sub>**

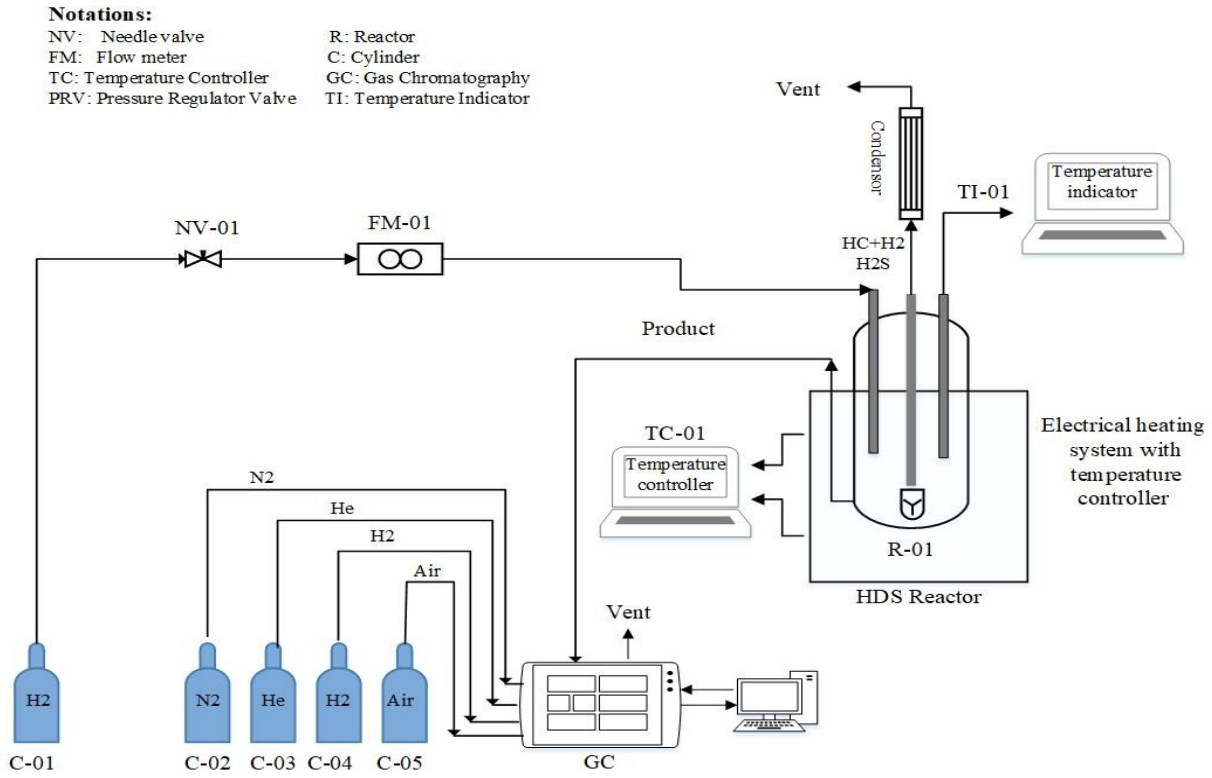

**Figure 2.S. Schematic diagram of experimental setup toward hydrodesulfurization process over combusted NMACA-x nanocatalysts**
